# Supplementary material for: Hairy Root Induction of Taxus baccata L. by Natural Transformation with Rhizobium rhizogenes
Source: MDPI journal article supplement (doi:10.3390/horticulturae9010004), 2022-12-20
Supplement: s1 [file s1]

## Supplemental File S1

**Direct inoculation *in vitro*: *in vitro* shoot inoculation by directly inoculating with solid bacterial culture.***Bacterial strain*

A4 strain of *Rhizobium rhizogenes* was used for induction of hairy roots. A solid bacterial culture of *R. rhizogenes* was prepared by dipping a sterile inoculation loop (Copan, California, USA) in a bacterial stock, and plating it on malt yeast agar (MYA) medium containing 15 g L<sup>-1</sup> agar (Duchefa) in a petri dish. The bacterial culture was left for 4 days in an incubator at 28°C.

*In vitro* shoot inoculation by directly inoculating with solid bacterial culture

*In vitro* *T. baccata* germinated seedlings (Figure S1A) were obtained from embryo rescue (He, J. unpublished data). The roots of approximately 4 months old seedlings were cut with a scalpel to produce *in vitro* shoots (Figure S1). The cutting site of the shoot explants were smeared on *R. rhizogenes* culture (n=20), whilst the same number of control explants were smeared on solid MYA medium. Afterwards, the explants were transferred to rooting media (half strength MS media + 2.5 g L<sup>-1</sup> gelrite), and grown in a climate chamber (Conviron No. A1000, Canada) at 25°C, with light at 40 µmol m<sup>-2</sup> s<sup>-1</sup>, under a 16 h light / 8 h dark photoperiod. The experiment was repeated twice.

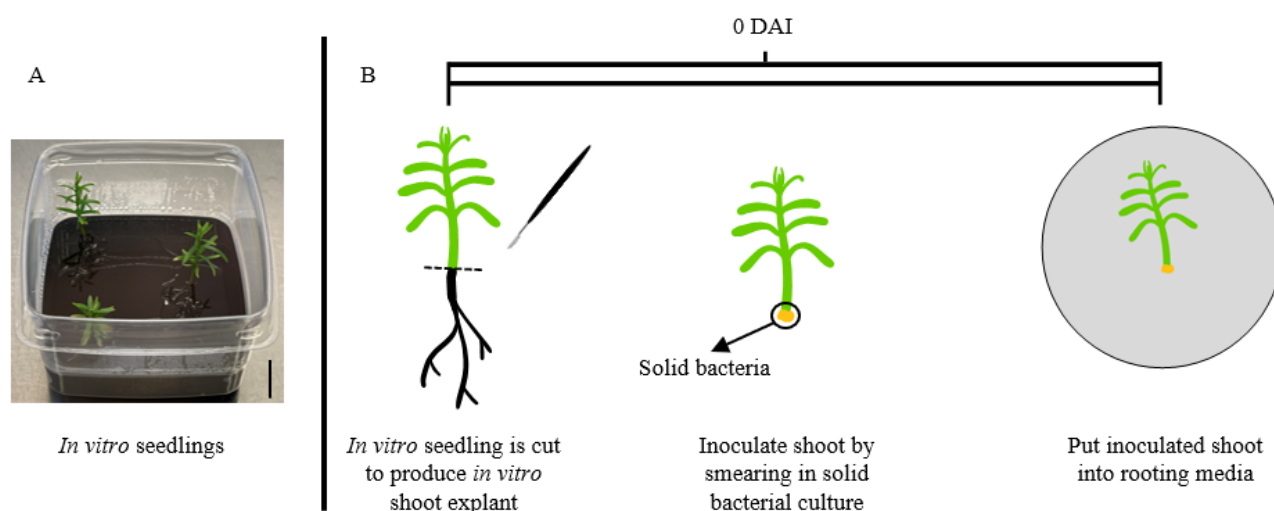

**Figure S1.** Plant material and schematic representation for the inoculation of *in vitro* shoot by the direct inoculation method. (A) *T. baccata* *in vitro* seedling, bars = 1 cm; (B) schematic representation. DAI: days after infection.
