# Supplementary material for: Hairy Root Induction of Taxus baccata L. by Natural Transformation with Rhizobium rhizogenes
Source: MDPI journal article supplement (doi:10.3390/horticulturae9010004), 2022-12-20
Supplement: s1 [file s1]

## Supplemental File S2

**Liquid co-culture *in vitro*: *in vitro* seedling inoculation by liquid co-culture with bacteria.**

*In vitro* *T. baccata* germinated seedlings (Figure S2A) were obtained from embryo rescue (He, J. unpublished data). Approximately 10 weeks old *in vitro* seedlings (n=18) were wounded with a 21G x 1 ½" (0.80 x 40 mm) sterile syringe needle (Braun). Each seedling was wounded approximately twenty times across the needles, the stem, and the roots (Figure S2B). The seedlings were submerged in a culture box containing 100 mL of a liquid culture of *R. rhizogenes* (see manuscript), whilst the same number of controls were submerged 100 mL of MYA medium. The culture boxes were gently shaken for 30 min, after which the seedlings were placed in plates containing half strength MS media and a sterile filter paper. After 2 days of co-cultivation in dark conditions, at 25°C, the explants were washed with sterile milli-Q water containing 100 mg L<sup>-1</sup> of Timentin (Duchefa). Afterwards, the explants were transferred to the rooting media (full strength MS + 5.0 g L<sup>-1</sup> activated charcoal (Duchefa) + 2.5 g L<sup>-1</sup> gelrite (Duchefa), 200 mg L<sup>-1</sup> timentin, and 1 mL L<sup>-1</sup> atamon (Torsleffs, Denmark)), and kept in the dark, at 25°C. The experiment was repeated 4 times.

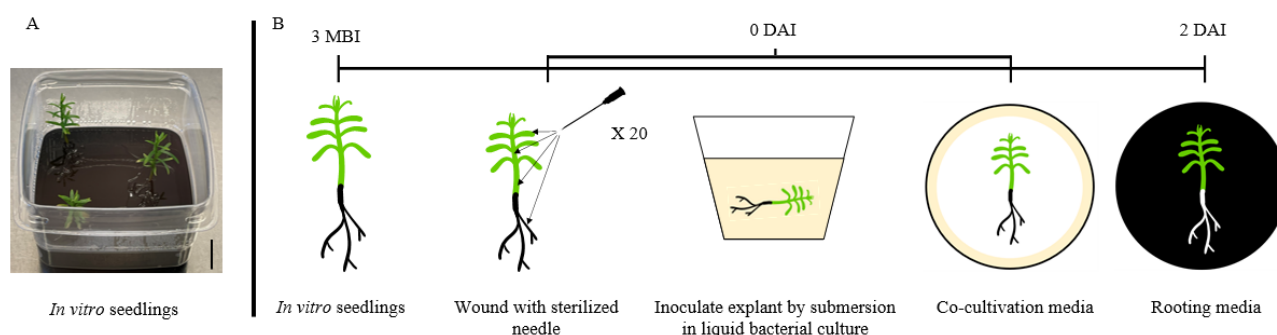

**Figure S2.** Plant material and schematic representation for the inoculation of *in vitro* seedlings by liquid co-culture with bacteria. (A) *T. baccata* *in vitro* seedling, bars = 1 cm; (B) schematic representation; MBI: Months before inoculation; DAI: days after inoculation.
